# Supplementary material for: Synthesis and fluorescence properties of unsymmetrical 1,4-dihydropyrrolo[3,2-b]pyrrole dyes
Source: Royal Society of Chemistry journal article supplement (doi:10.1039/d1nj04663b), 2021-12-17
Supplement: d1nj04663b1.pdf [file d1nj04663b1.pdf]

## *Supporting information*

### **Synthesis and Fluorescence Properties of Unsymmetrical 1,4-Dihydropyrrolo[3,2-*b*]pyrrole Dyes**

Yasuhiro Kubota,<sup>a,\*</sup> Kenta Koide,<sup>a</sup> Yuka Mizuno,<sup>a</sup> Masato Nakazawa,<sup>a</sup> Toshiyasu Inuzuka,<sup>b</sup> Kazumasa

Funabiki<sup>a</sup> Hiroyasu Sato<sup>c</sup> and Masaki Matsui<sup>a</sup>

<sup>a</sup>*Department of Chemistry and Biomolecular Science, Faculty of Engineering, Gifu University, 1-1 Yanagido,*

*Gifu, 501-1193, Japan*

<sup>b</sup>*Life Science Research Center, Gifu University, 1-1 Yanagido, Gifu 501-1193, Japan*

<sup>c</sup>*Rigaku Corporation 3-9-12 Matsubara-Cho, Akishima, Tokyo 196-8666, Japan*

*kubota@gifu-u.ac.jp*

## **Contents**

1. <sup>1</sup>H NMR spectrum of bromination of **2** (**Figure S1**)
2. Mulliken charge distribution of **2** (**Figure S2**)
3. Experimentally obtained bond lengths and torsion angles (**Figure S3, S4**)
4. UV-vis absorption spectra in various solvents (**Figure S5–S7**)
5. Fluorescence spectra in various solvents (**Figure S8, S9**)
6. Representation of solvent-relaxed Franck-Condon (FC) excited state and solvent-relaxed FC ground state in chlorinated solvents (**Figure S10**)
7. Fluorescence spectra in the crystalline state (**Figure S11**)
8. Absorption and fluorescence properties in various solvents (**Table S1–Table S3**)
9. <sup>1</sup>H and <sup>13</sup>C NMR spectra (**Figure S12–Figure S17**)

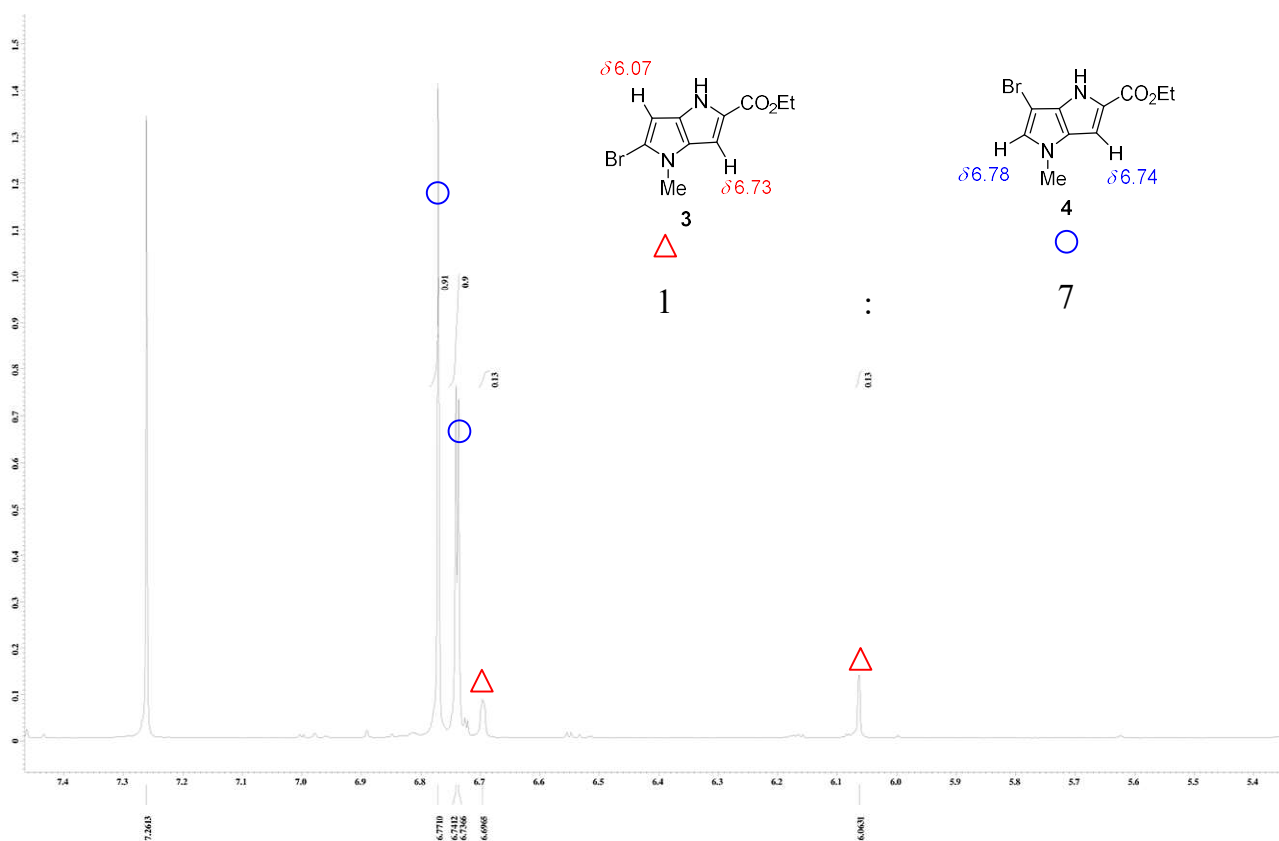

**Figure S1.** <sup>1</sup>H NMR spectrum of bromination of **2** in CDCl<sub>3</sub>.

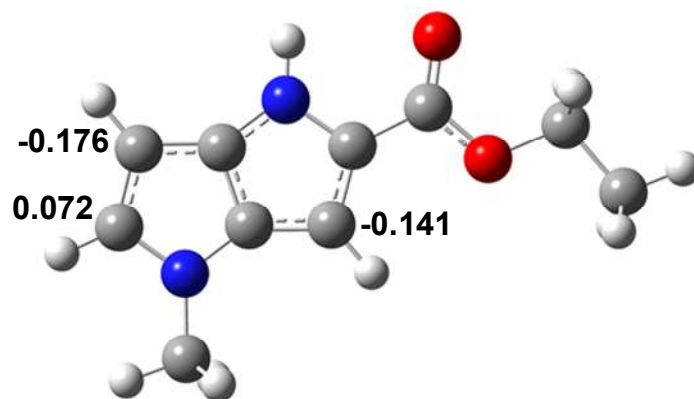

**Figure S2.** Mulliken charge distribution of **2**. The geometry optimization was performed using the B3LYP/6-31G(d,p) with THF as solvent.

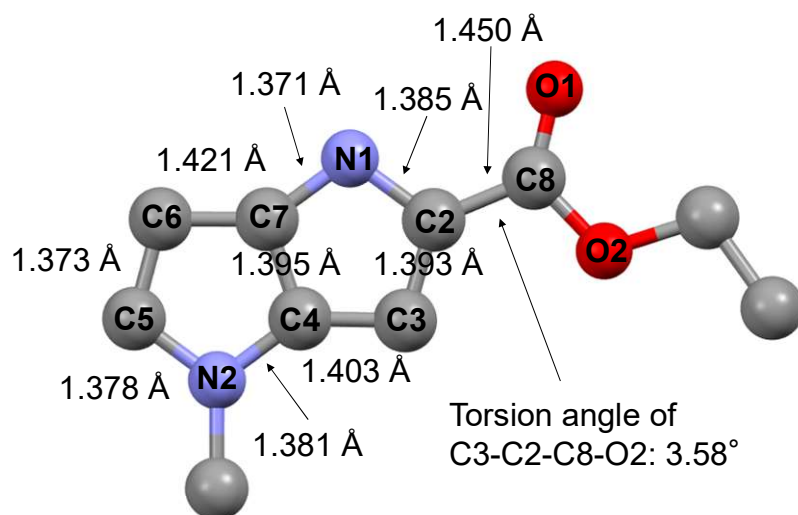

**Figure S3.** Experimentally obtained bond lengths and torsion angle in the crystalline state.

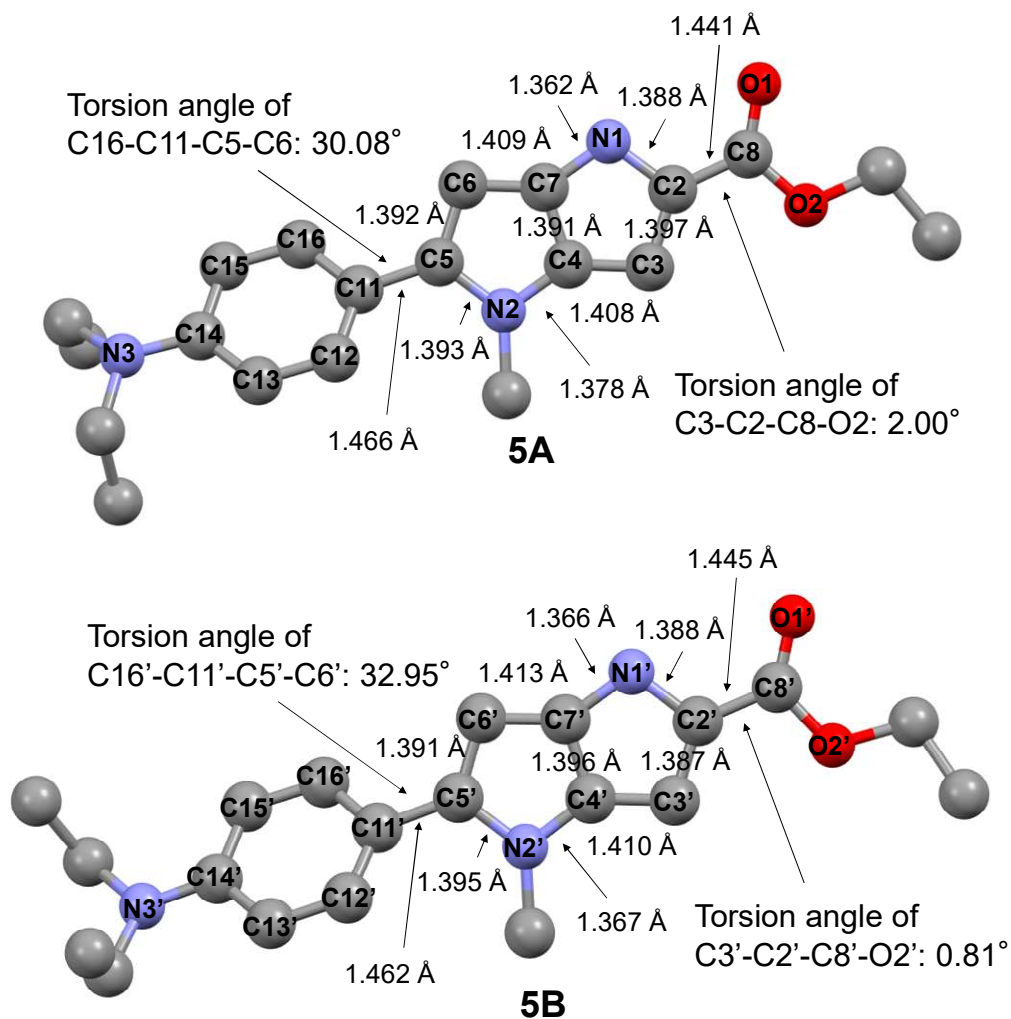

**Figure S4.** (a) Experimentally obtained bond lengths and torsion angles of **5A** and **5B** in the crystalline state.

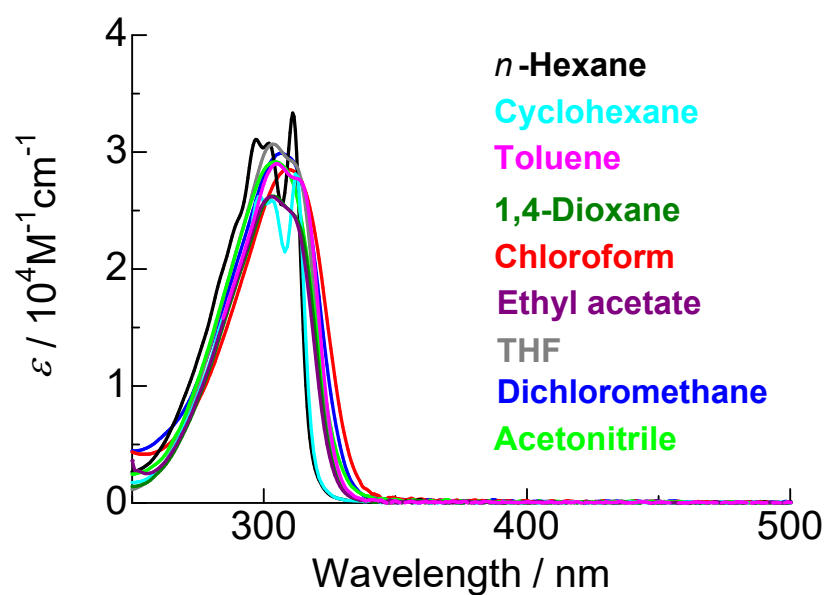

**Figure S5.** UV-visible absorption spectra of **2** in various solvents ( $1.0 \times 10^{-5}$  M).

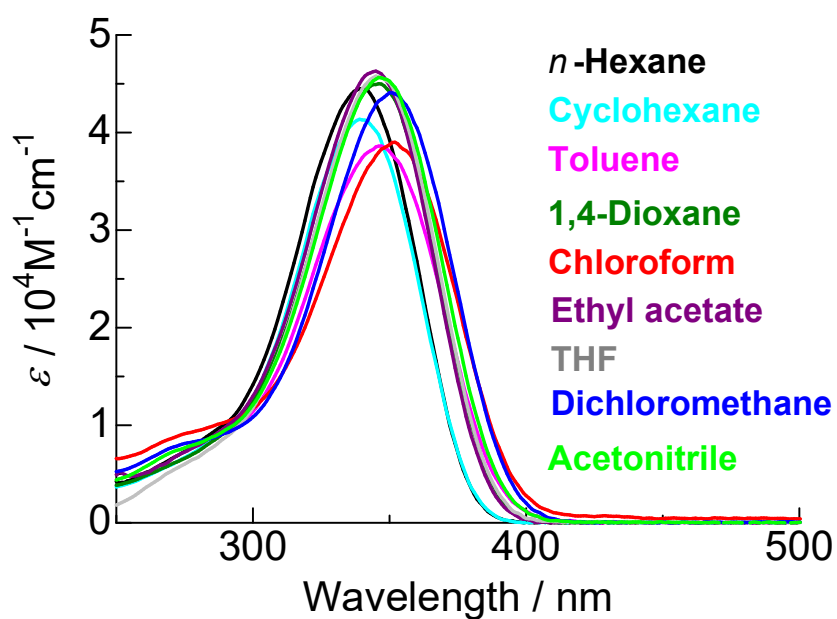

**Figure S6.** UV-visible absorption spectra of **5** in various solvents ( $1.0 \times 10^{-5}$  M).

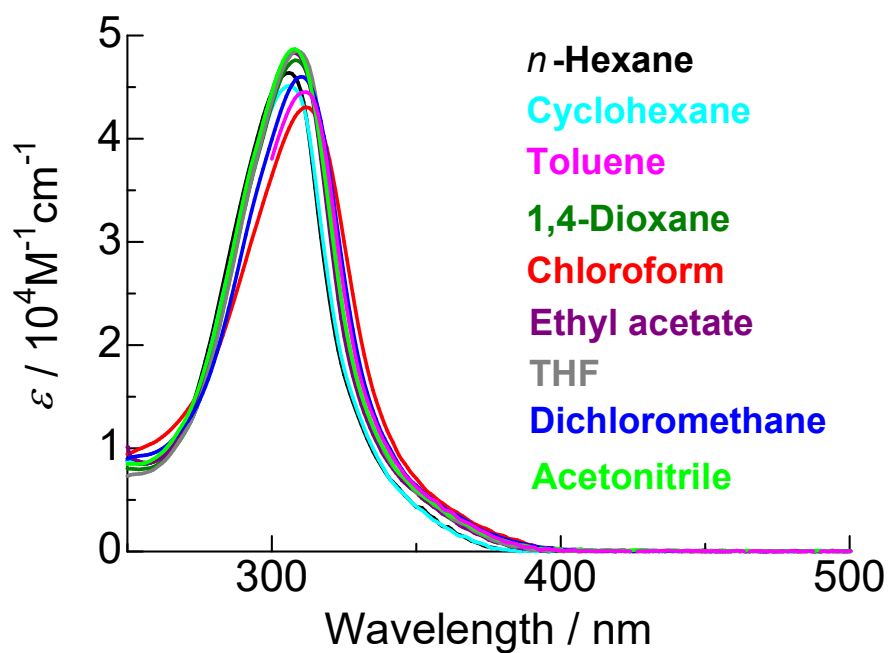

**Figure S7.** UV–visible absorption spectra of **6** in various solvents ( $1.0 \times 10^{-5}$  M).

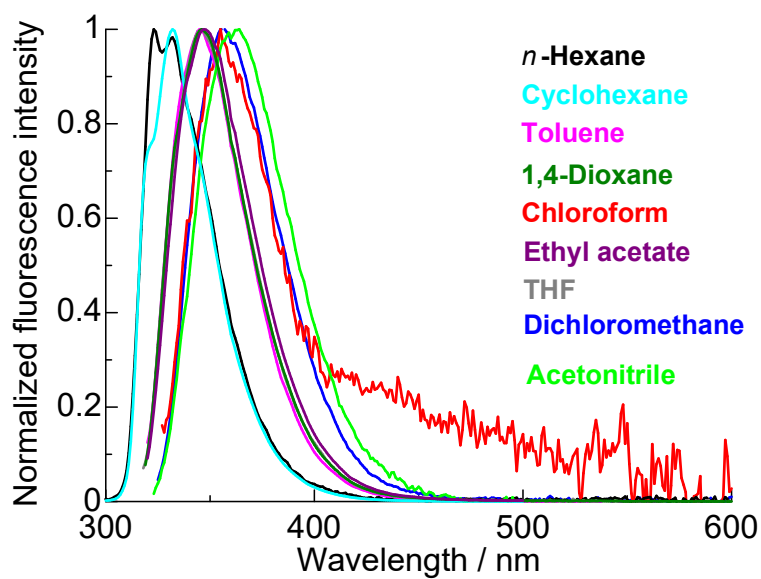

**Figure S8.** Normalized fluorescence spectra of **2** in various solvents ( $1.0 \times 10^{-5}$  M).

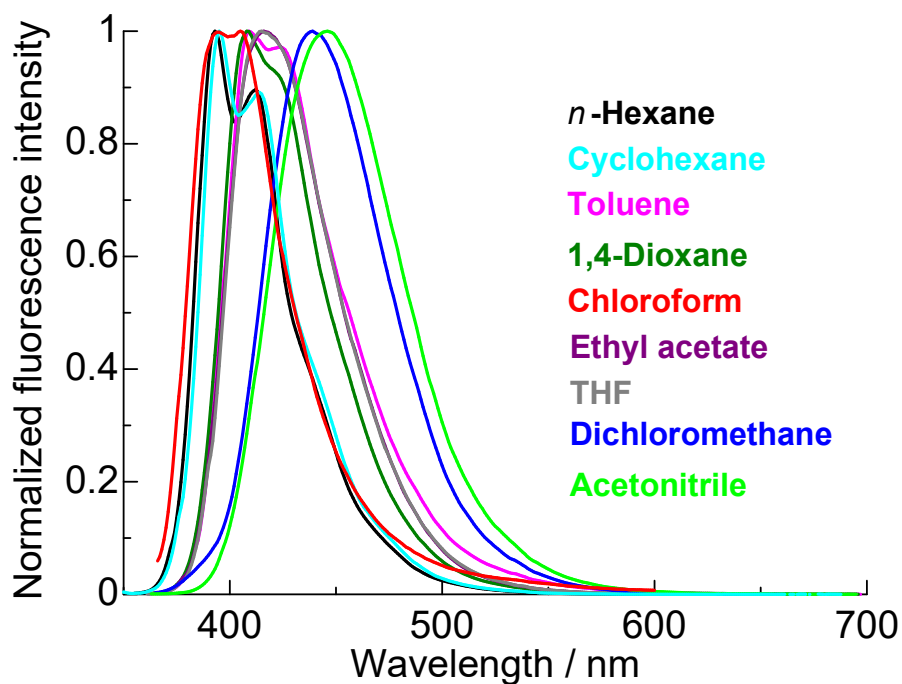

**Figure S9.** Normalized fluorescence spectra of **5** in various solvents ( $1.0 \times 10^{-5}$  M).

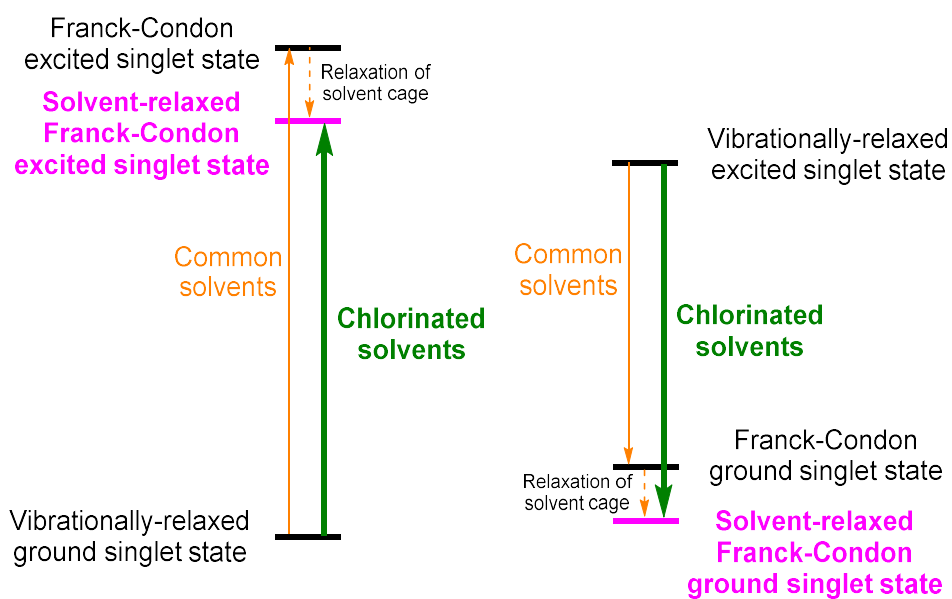

**Figure S10.** Representation of solvent-relaxed Franck-Condon (FC) excited state and solvent-relaxed FC ground state in chlorinated solvents.

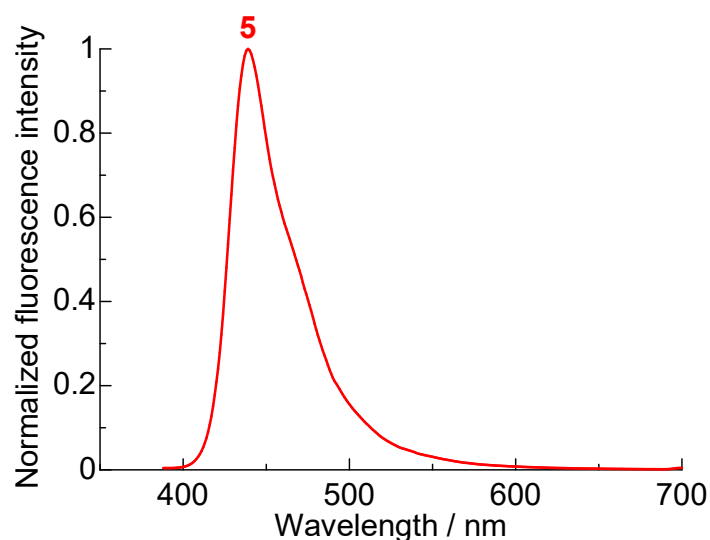

**Figure S11.** Fluorescence spectra of **5** in the crystalline state.

**Table S1.** Optical properties of **2** in various solvents<sup>a</sup>

| Solvent                         | $\lambda_{ab}$ ( $\epsilon$ ) / nm       | $\lambda_{fl}^b$ / nm | $\Phi_f^c$ |
|---------------------------------|------------------------------------------|-----------------------|------------|
| <i>n</i> -Hexane                | 297 (31,100), 302 (30,800), 311 (33,300) | 323                   | 0.21       |
| Cyclohexane                     | 298 (26,200), 303 (25,900), 312 (28,100) | 332                   | 0.34       |
| Toluene                         | 305 (29,000)                             | 345                   | 0.49       |
| 1,4-Dioxane                     | 303 (26,200)                             | 346                   | 0.06       |
| CHCl <sub>3</sub>               | 309 (28,500)                             | 355                   | < 0.01     |
| Ethyl acetate                   | 303 (26,200)                             | 347                   | 0.04       |
| THF                             | 304 (30,700)                             | 346                   | 0.05       |
| CH <sub>2</sub> Cl <sub>2</sub> | 307 (29,900)                             | 356                   | 0.03       |
| MeCN                            | 305 (29,200)                             | 364                   | 0.01       |

<sup>a</sup>Measured at a concentration of  $1.0 \times 10^{-5}$  M. <sup>b</sup>The excitation wavelengths ( $\lambda_{ex}$ ) were as follows: hexane (321 nm), cyclohexane (311 nm), 1,4-dioxane (313 nm), toluene (315 nm), chloroform (319 nm), ethyl acetate (313 nm), THF (313 nm), dichloromethane (316 nm), and acetonitrile (314 nm). <sup>c</sup>Measured using an integrating sphere method.

**Table S2.** Optical properties of **5** in various solvents<sup>a</sup>

| Solvent                         | $\lambda_{ab}$ ( $\epsilon$ ) / nm | $\lambda_{fl}^b$ / nm | $\Phi_f^c$ |
|---------------------------------|------------------------------------|-----------------------|------------|
| <i>n</i> -Hexane                | 340 (44,500)                       | 393, 412              | 0.72       |
| Cyclohexane                     | 339 (41,400)                       | 395                   | 0.84       |
| Toluene                         | 347 (38,600)                       | 409, 423              | 0.93       |
| 1,4-Dioxane                     | 346 (45,000)                       | 408                   | 0.98       |
| CHCl <sub>3</sub>               | 351 (37,600)                       | 395, 405              | 0.09       |
| Ethyl acetate                   | 345 (46,300)                       | 416                   | 0.86       |
| THF                             | 345 (45,800)                       | 415                   | 0.94       |
| CH <sub>2</sub> Cl <sub>2</sub> | 350 (44,100)                       | 439                   | 0.87       |
| MeCN                            | 346 (45,600)                       | 446                   | 0.98       |

<sup>a</sup>Measured at a concentration of  $1.0 \times 10^{-5}$  M. The excitation wavelengths ( $\lambda_{ex}$ ) were as follows: *n*-hexane (350 nm), cyclohexane (349 nm), 1,4-dioxane (356 nm), toluene (357 nm), chloroform (361 nm), ethyl acetate (355 nm), THF (355 nm), dichloromethane (360 nm) and acetonitrile (356 nm). <sup>c</sup>Measured using an integrating sphere method.



**Table S3.** Optical properties of **6** in various solvents<sup>a</sup>

| Solvent                         | $\lambda_{ab}$ ( $\epsilon$ ) / nm | $\lambda_{fl}^b$ / nm                   | $\Phi_f^c$ |
|---------------------------------|------------------------------------|-----------------------------------------|------------|
| <i>n</i> -Hexane                | 306 (46,400)                       | 406 <sup>[d]</sup>                      | 0.16       |
| Cyclohexane                     | 306 (45,100)                       | 407 <sup>[d]</sup>                      | 0.21       |
| Toluene                         | 312 (44,500)                       | 459 <sup>[e]</sup>                      | 0.59       |
| 1,4-Dioxane                     | 308 (47,600)                       | 457 <sup>[e]</sup>                      | 0.38       |
| CHCl <sub>3</sub>               | 312 (43,000)                       | 388 <sup>[d]</sup> , 488 <sup>[e]</sup> | 0.07       |
| Ethyl acetate                   | 307 (48,300)                       | 469 <sup>[e]</sup>                      | 0.19       |
| THF                             | 309 (48,500)                       | 464 <sup>[e]</sup>                      | 0.26       |
| CH <sub>2</sub> Cl <sub>2</sub> | 310 (46,000)                       | 392 <sup>[d]</sup> , 517 <sup>[e]</sup> | 0.14       |
| MeCN                            | 308 (48,700)                       | 538 <sup>[e]</sup>                      | 0.05       |

<sup>a</sup>Measured at a concentration of  $1.0 \times 10^{-5}$  M. <sup>b</sup>The excitation wavelengths ( $\lambda_{ex}$ ) were as follows: *n*-hexane (316 nm), cyclohexane (316 nm), 1,4-dioxane (318 nm), toluene (322 nm), chloroform (322 nm), ethyl acetate (317 nm), THF (319 nm), dichloromethane (320 nm) and acetonitrile (318 nm). <sup>c</sup>Measured using an integrating sphere method. <sup>d</sup>Fluorescence from LE state. <sup>e</sup>Fluorescence from TICT state.

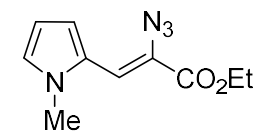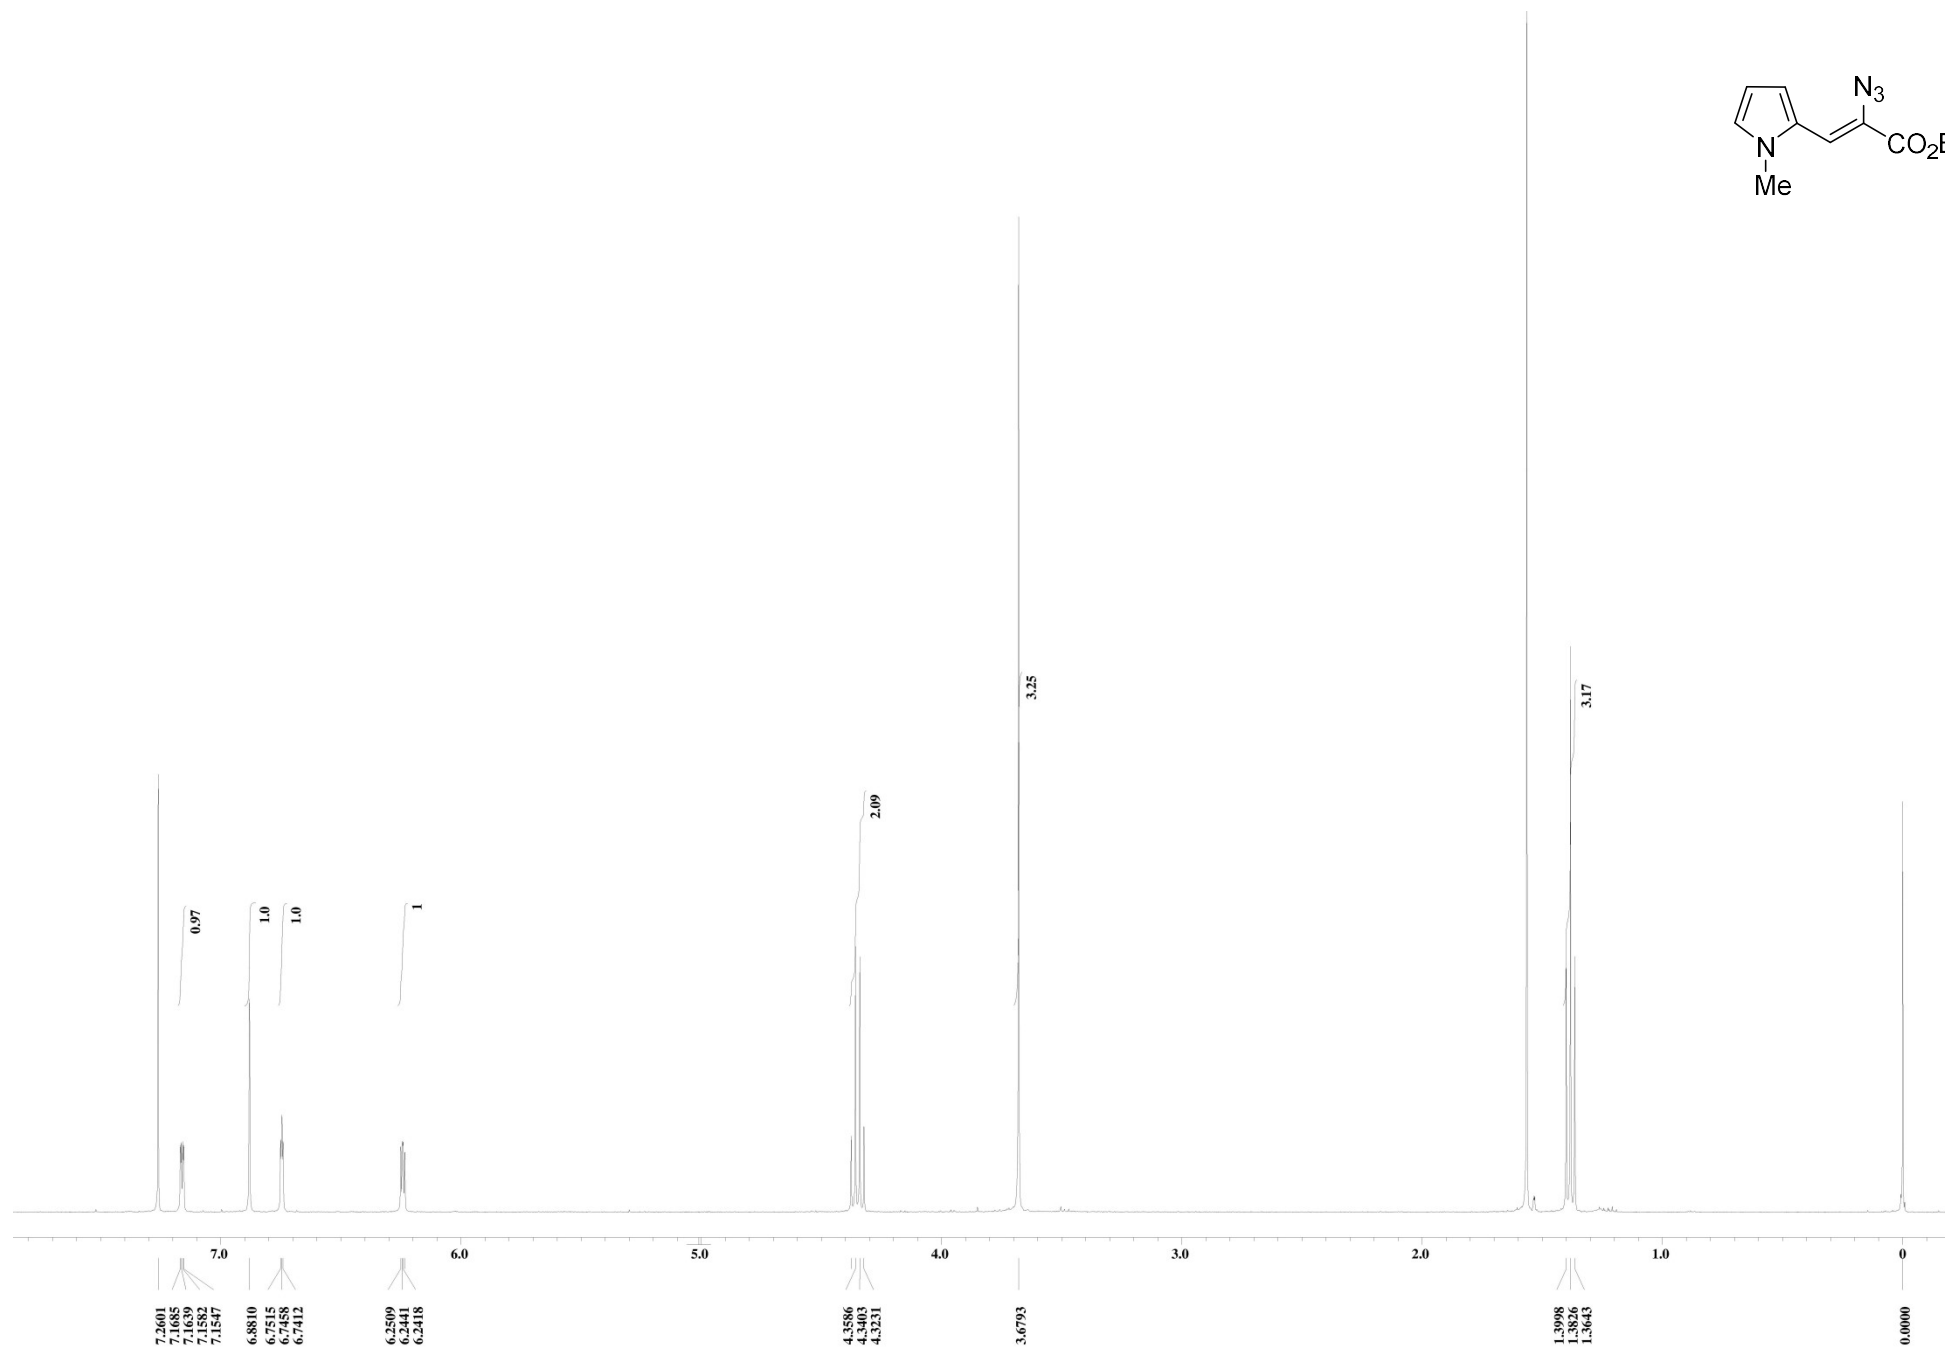

Figure S12. <sup>1</sup>H NMR spectrum of 1.

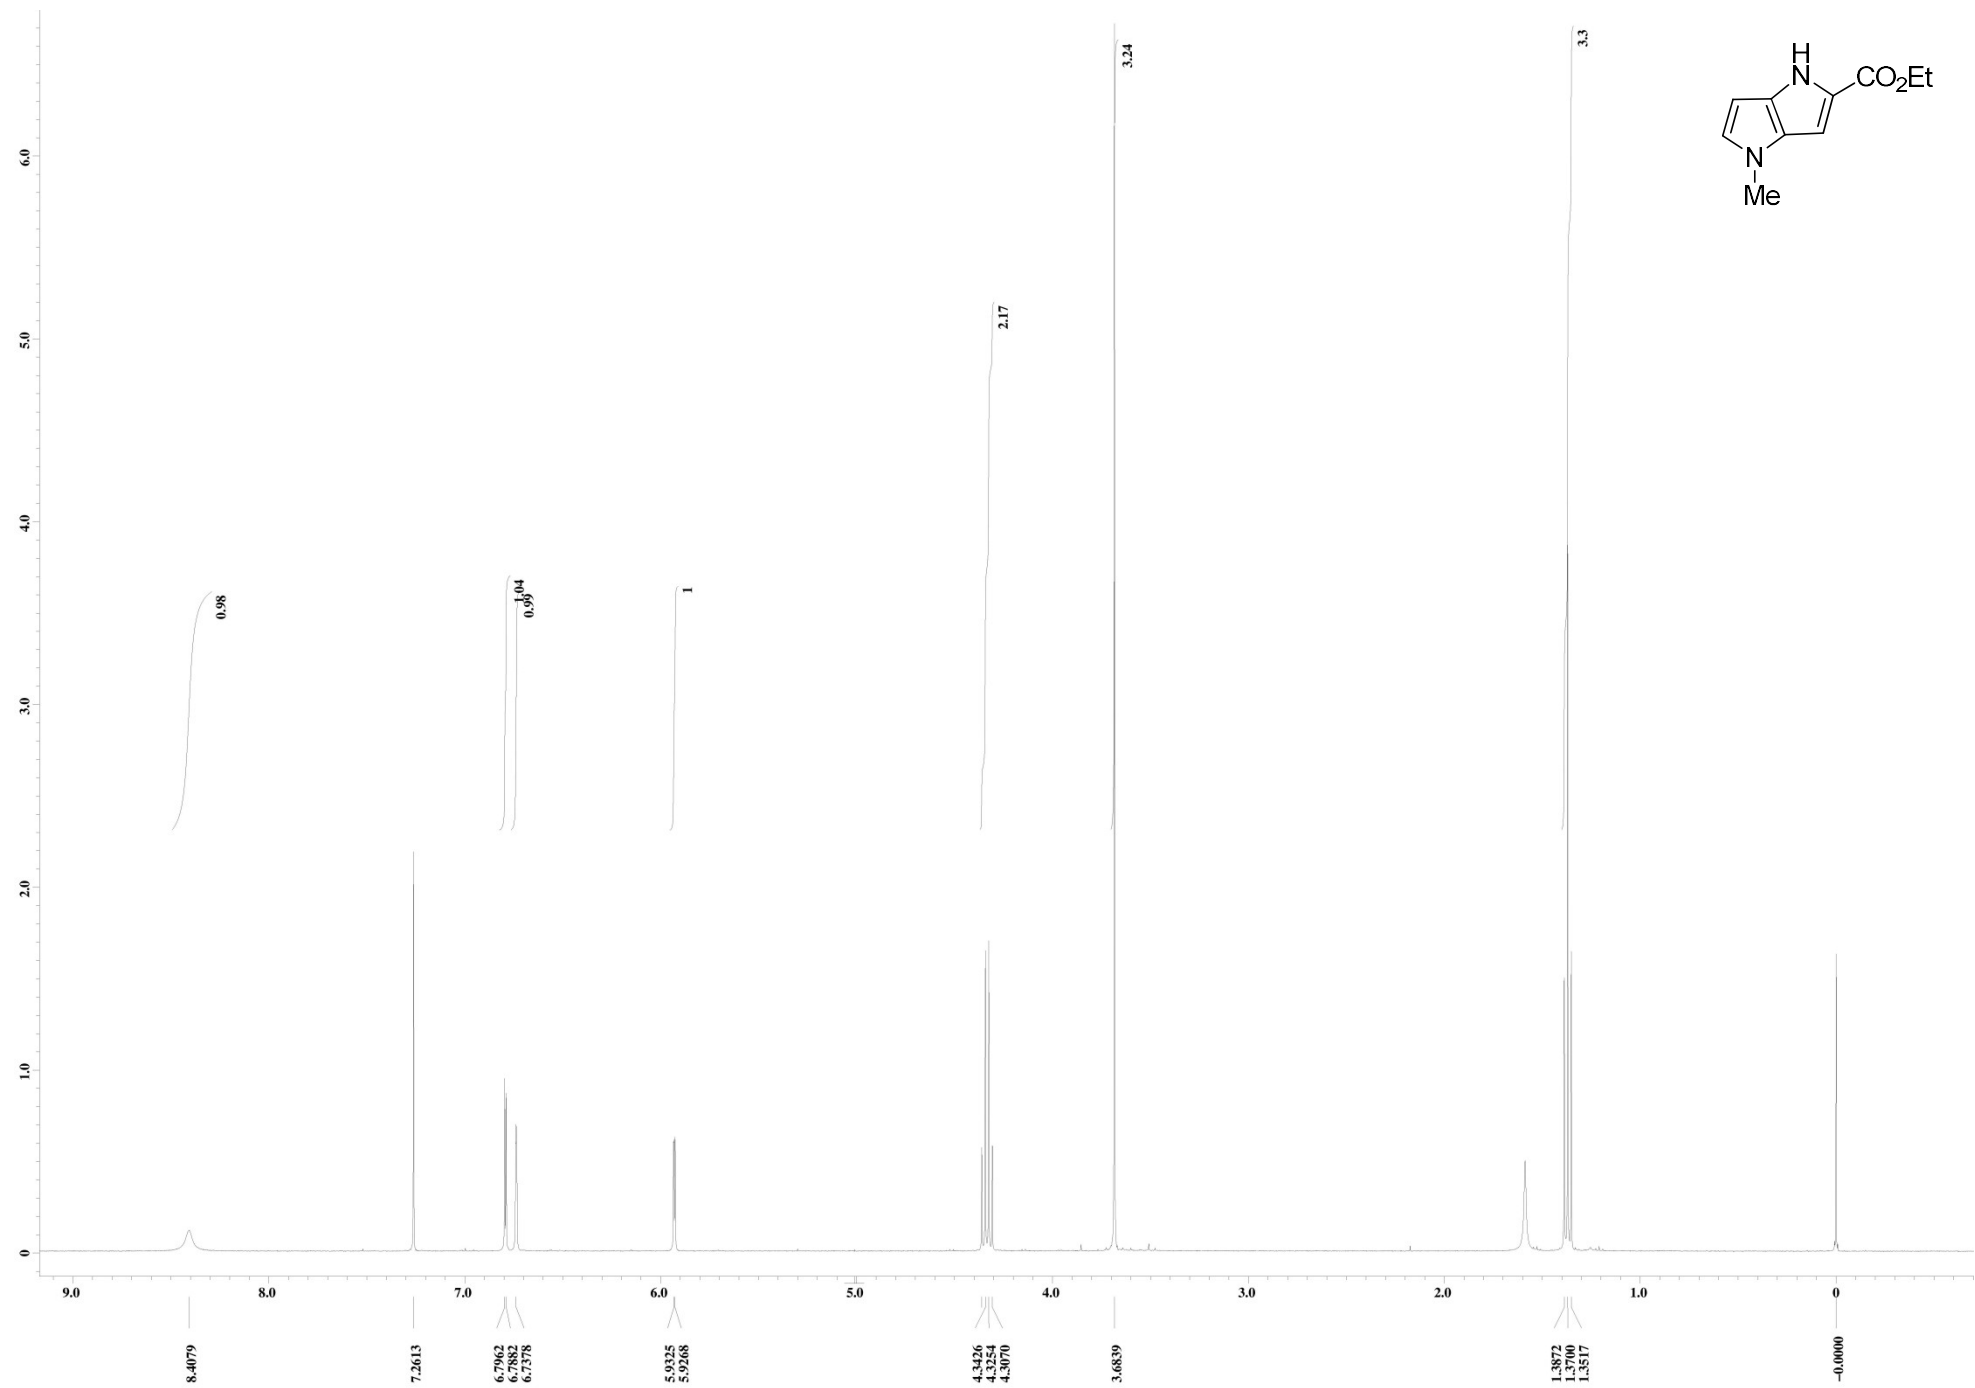

Figure S13. <sup>1</sup>H NMR spectrum of 2.

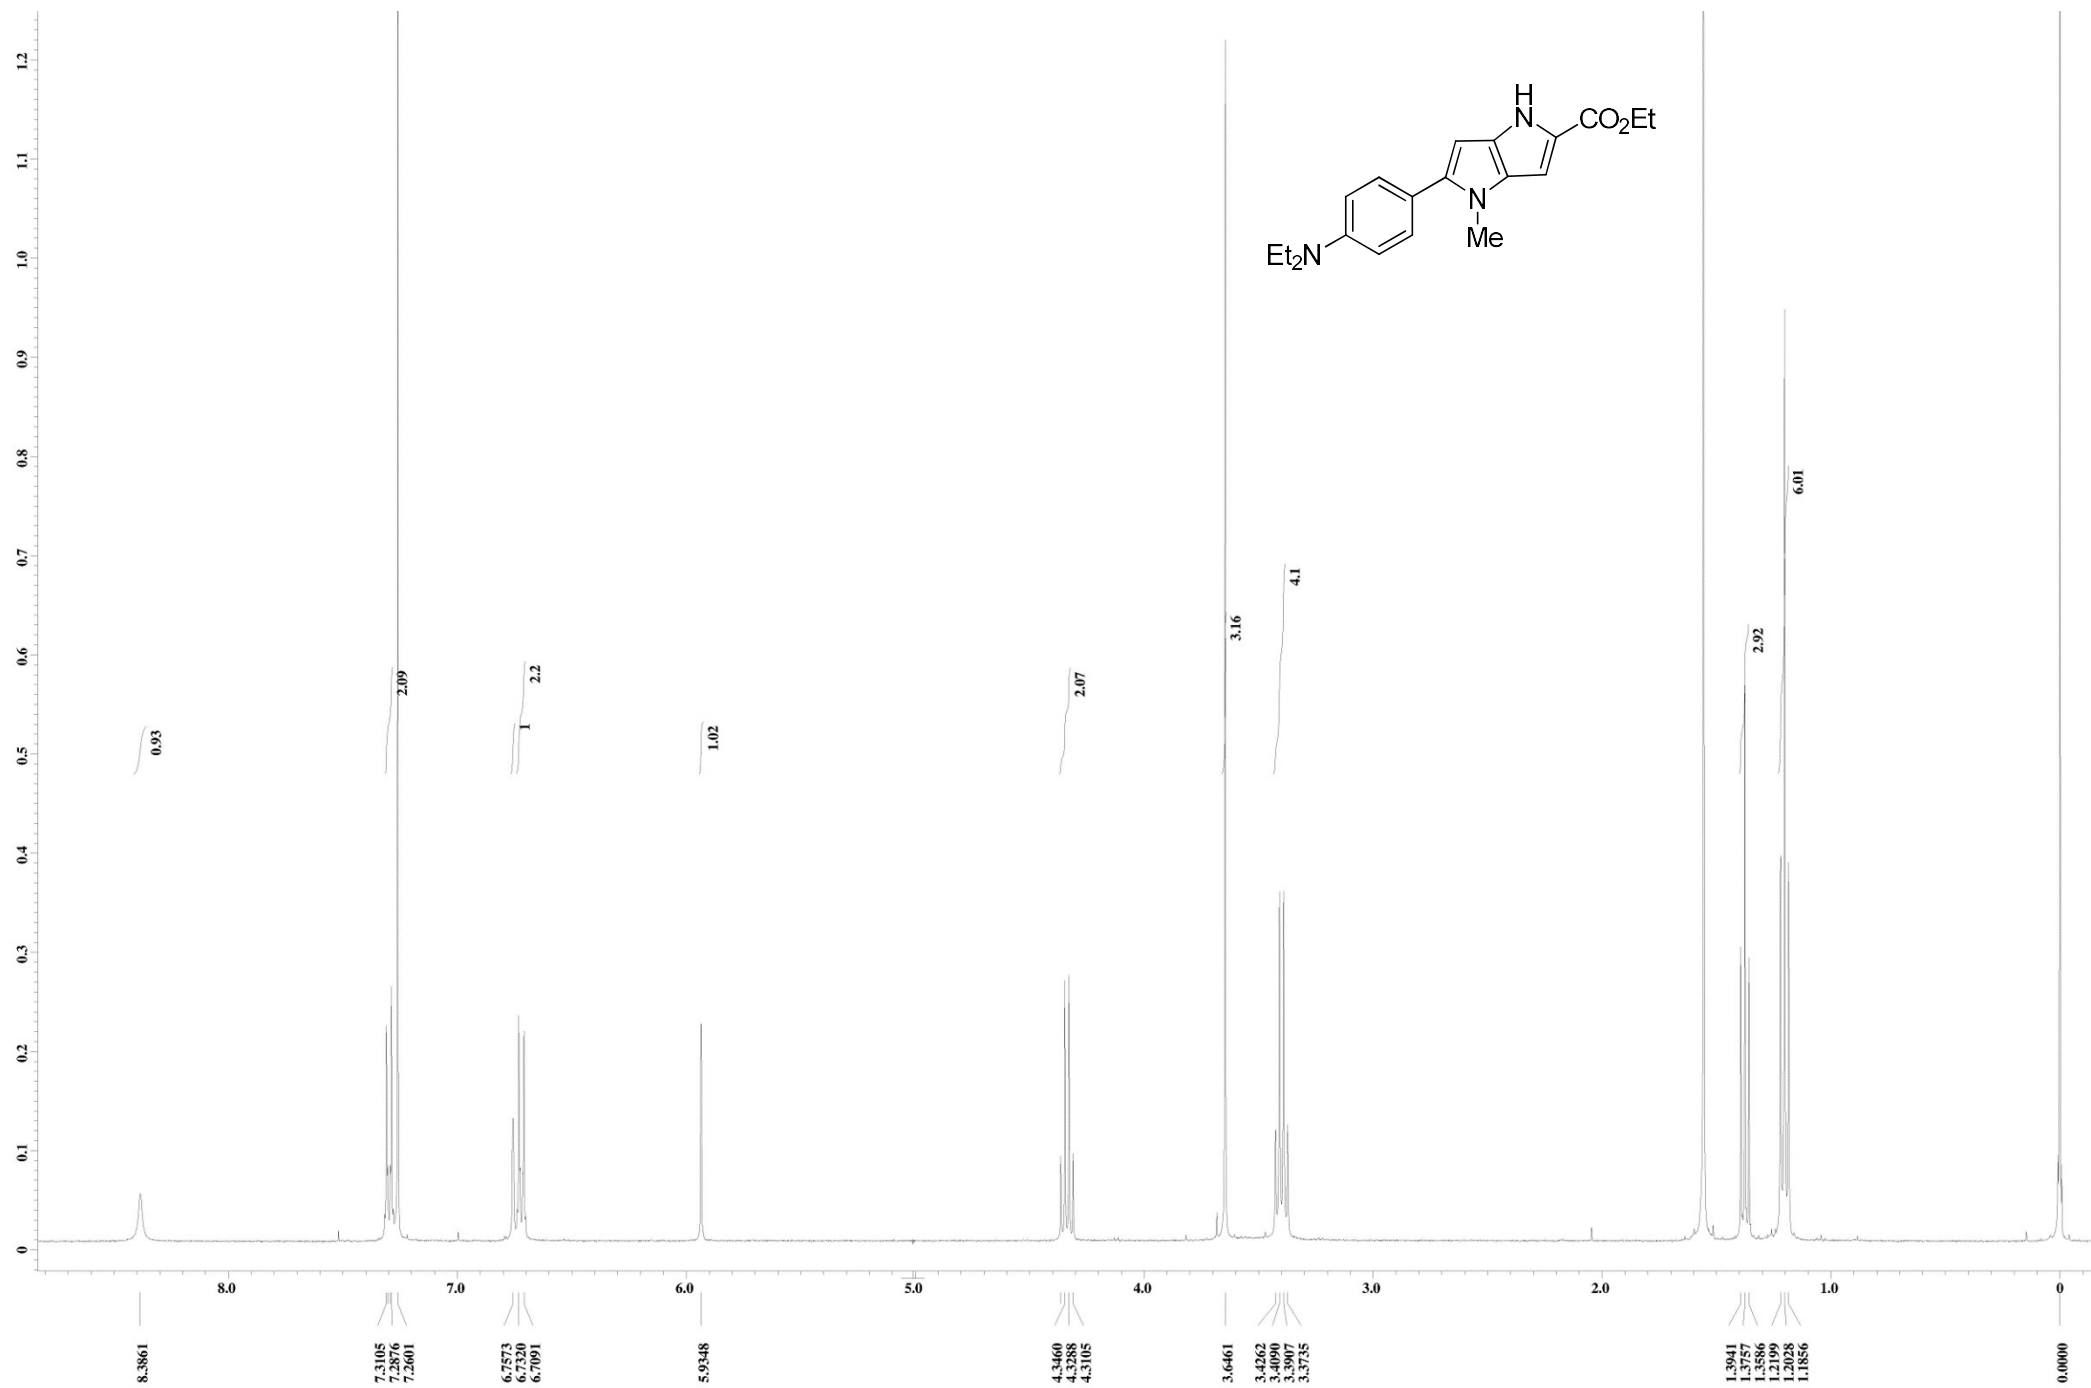

Figure S14. <sup>1</sup>H NMR spectrum of 5.

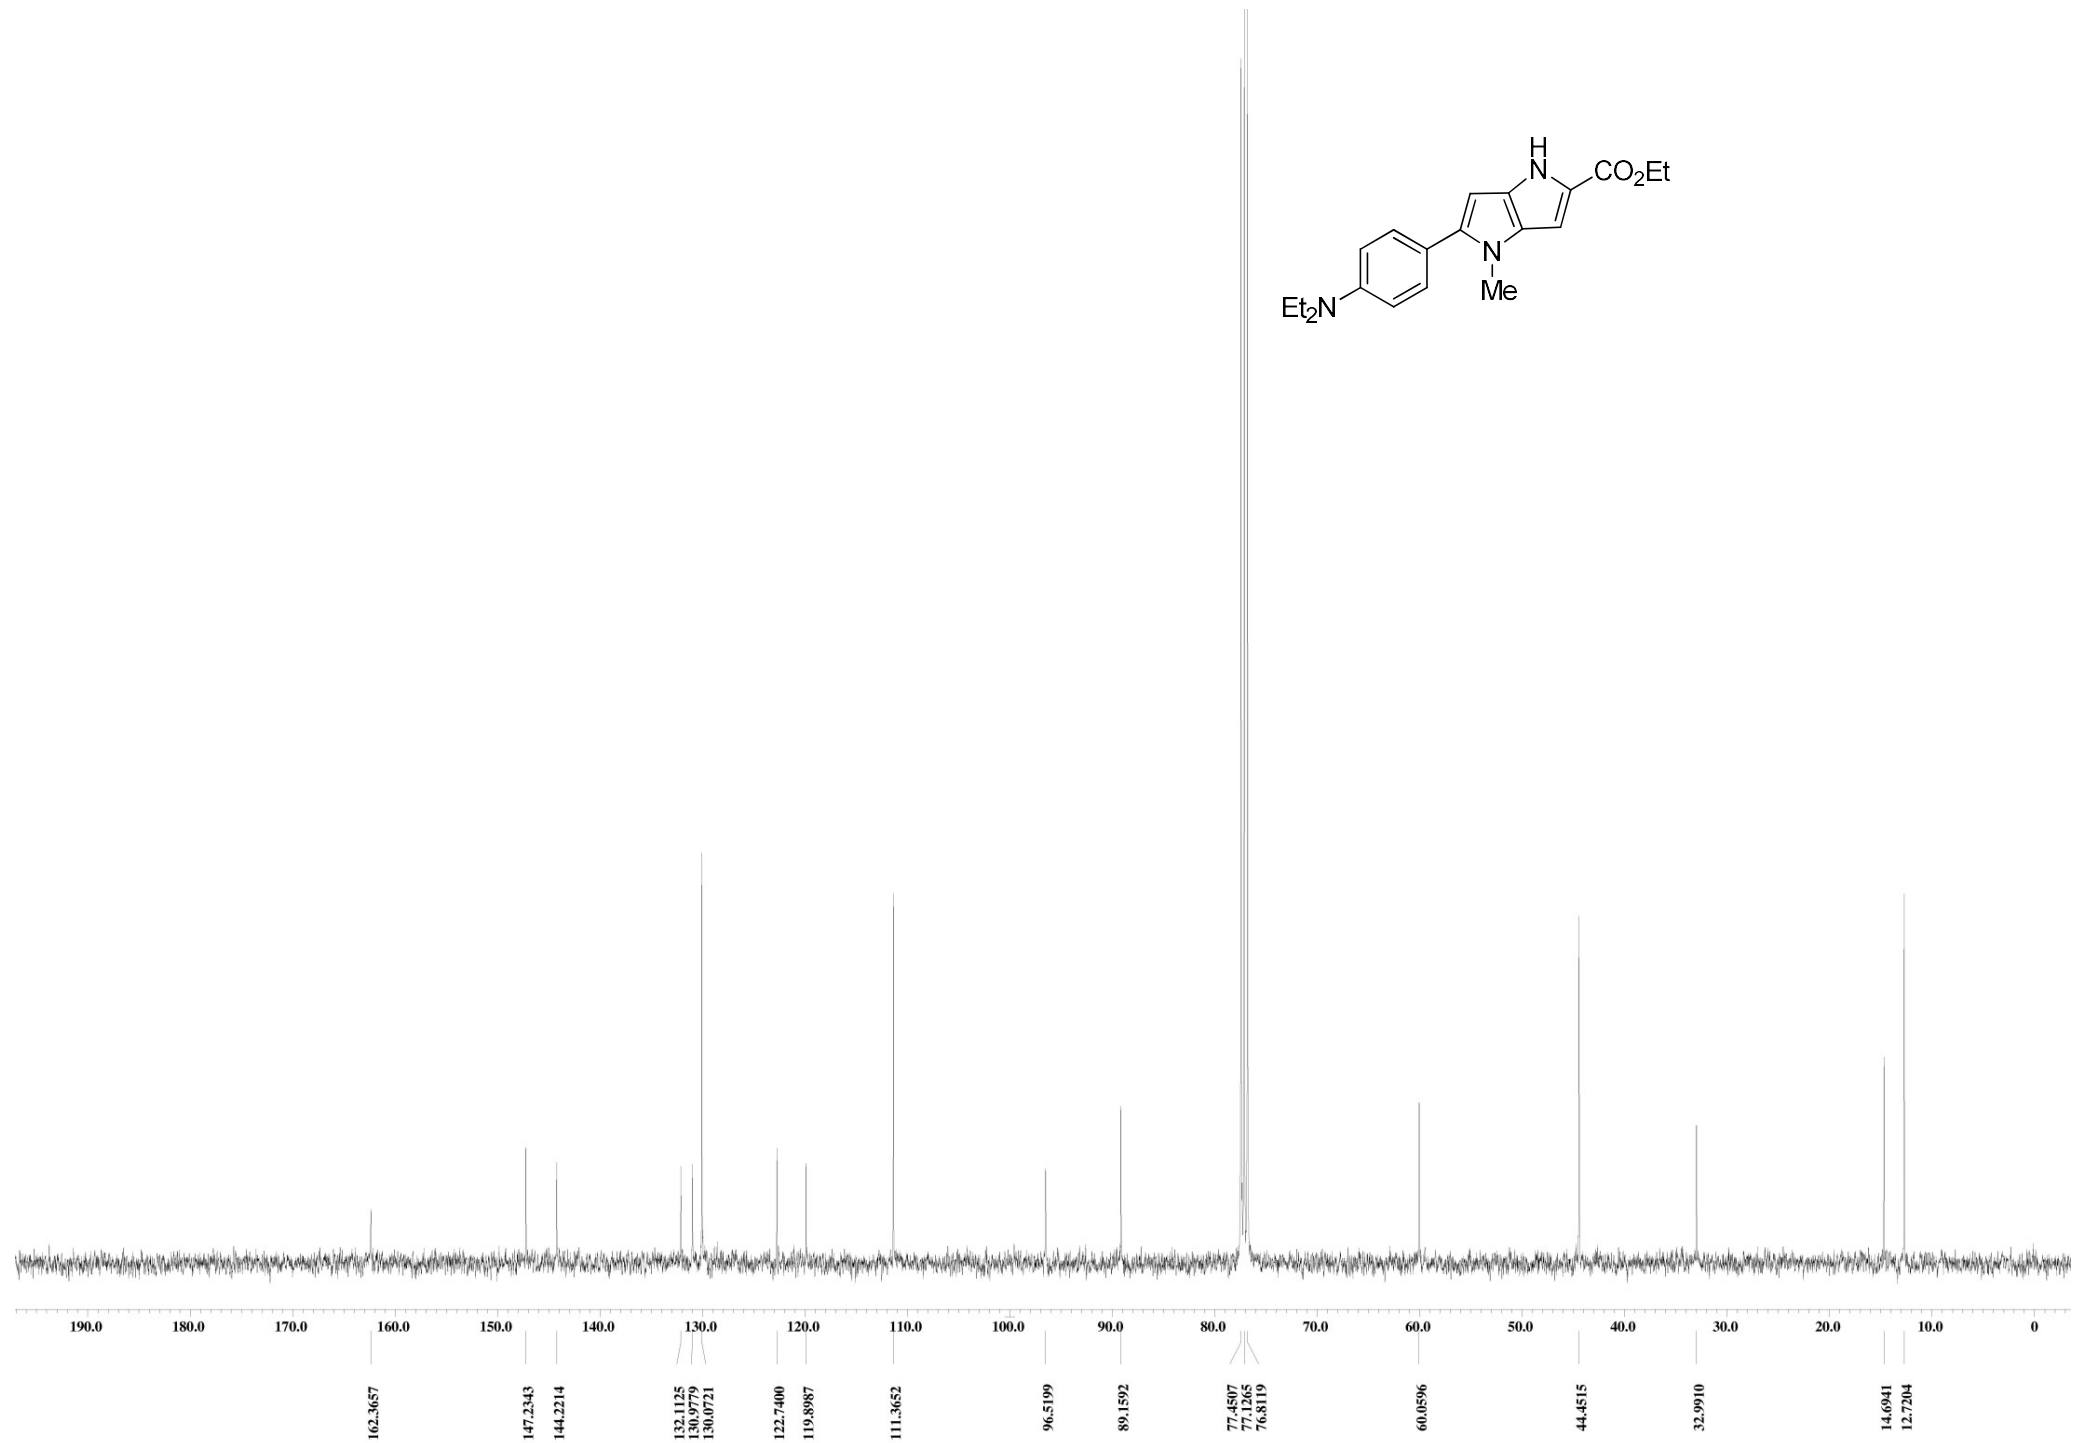

Figure S15.  $^{13}\text{C}$  NMR spectrum of 5.

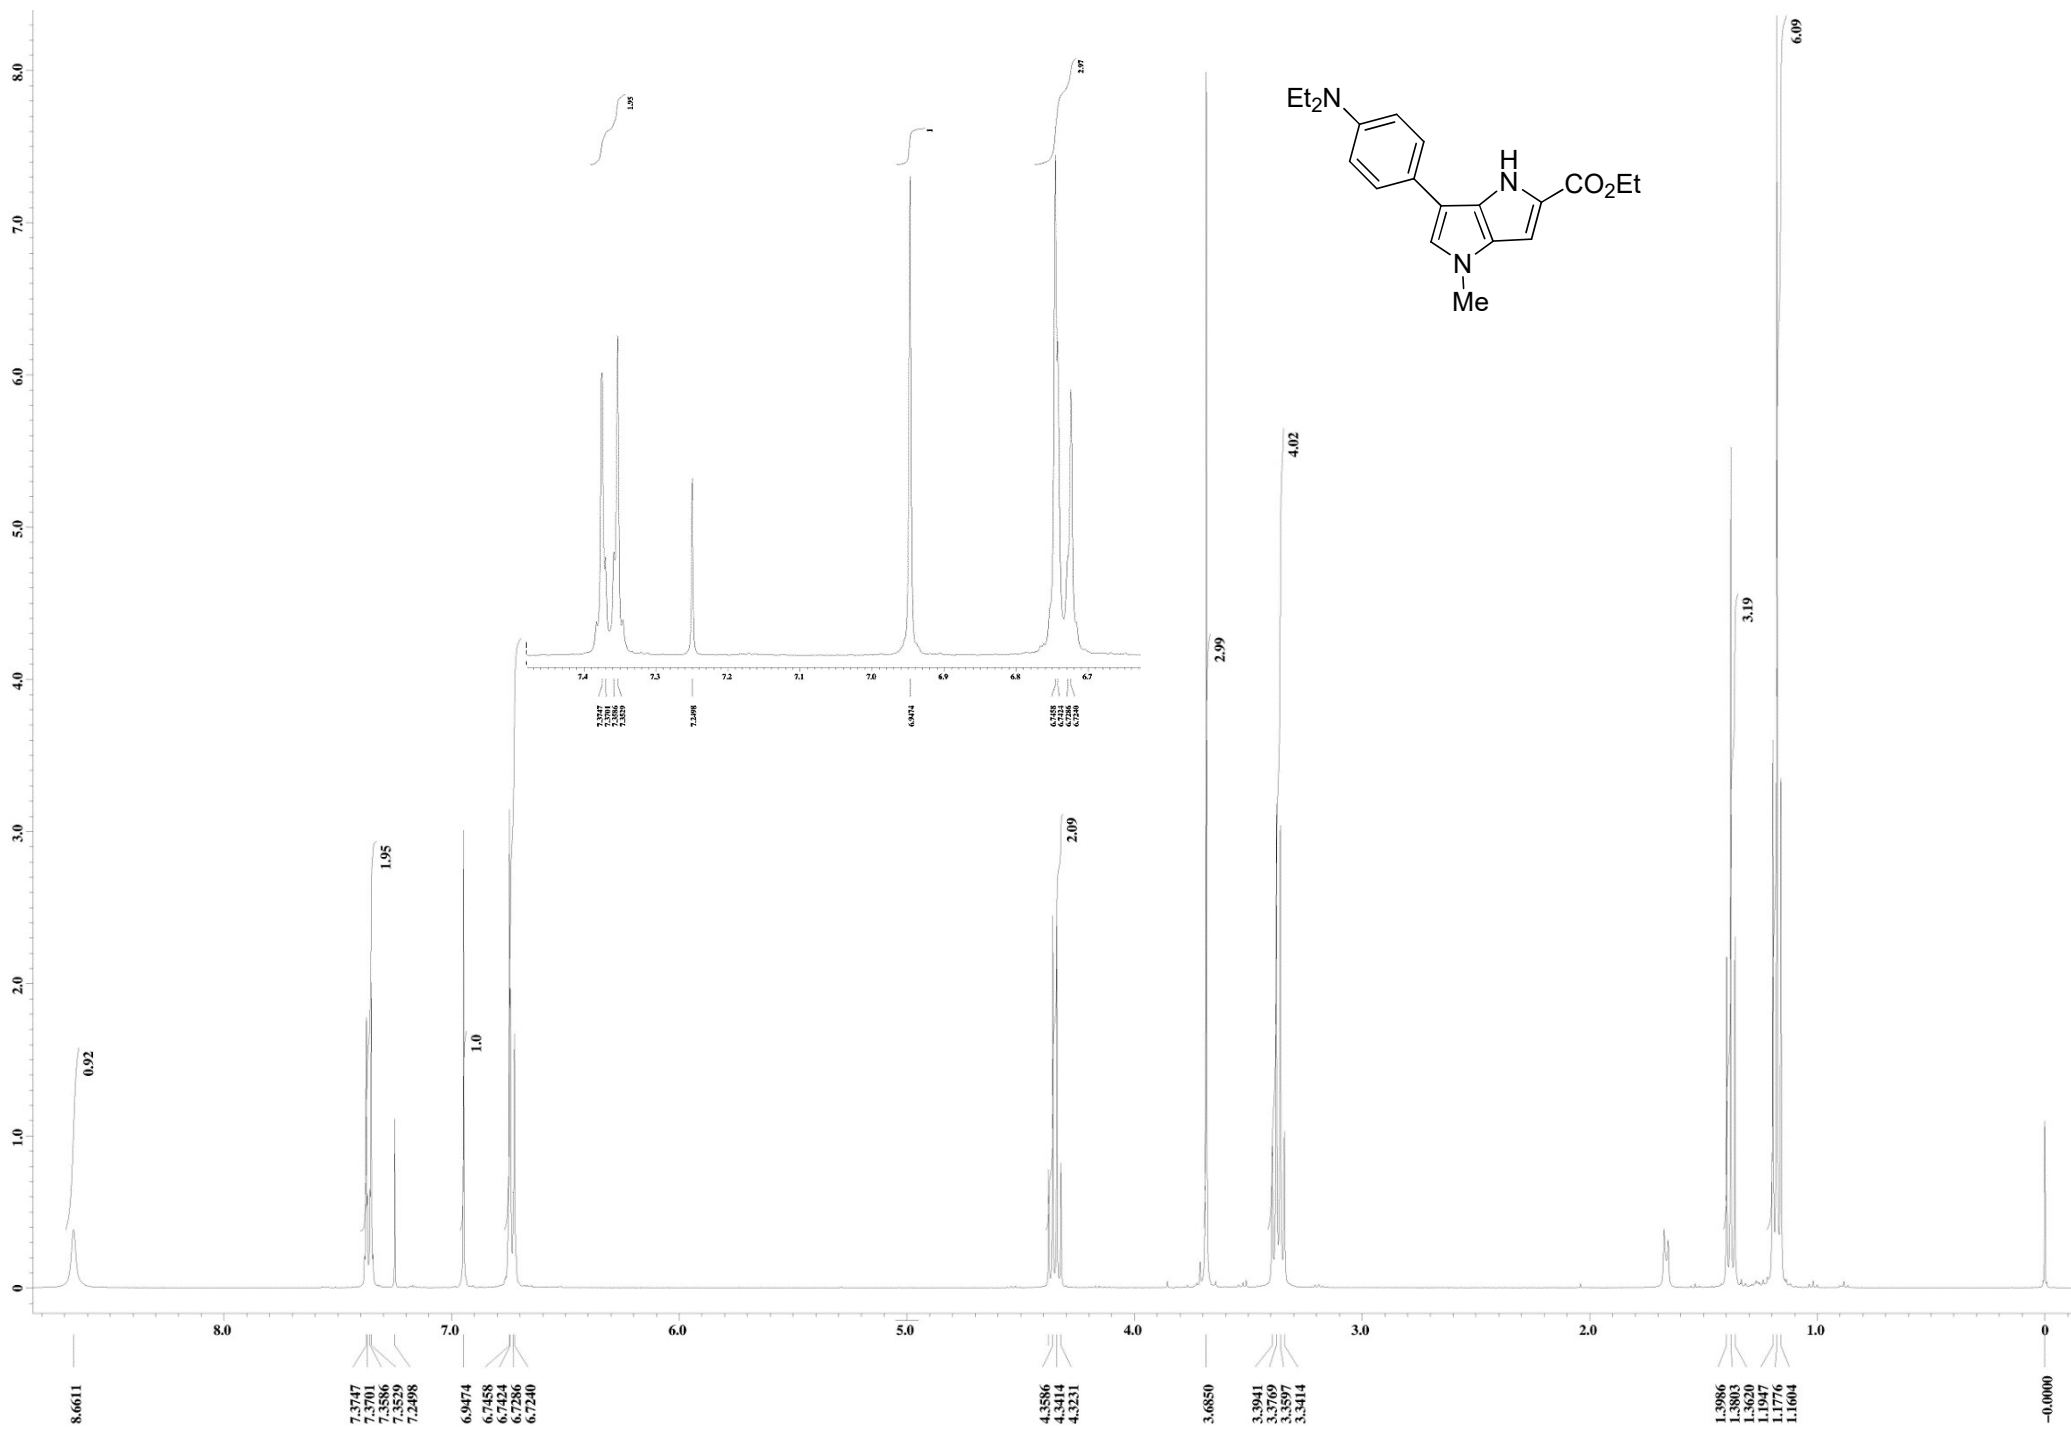

Figure S16. <sup>1</sup>H NMR spectrum of 6.

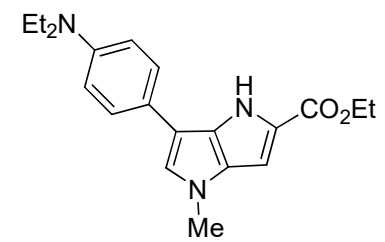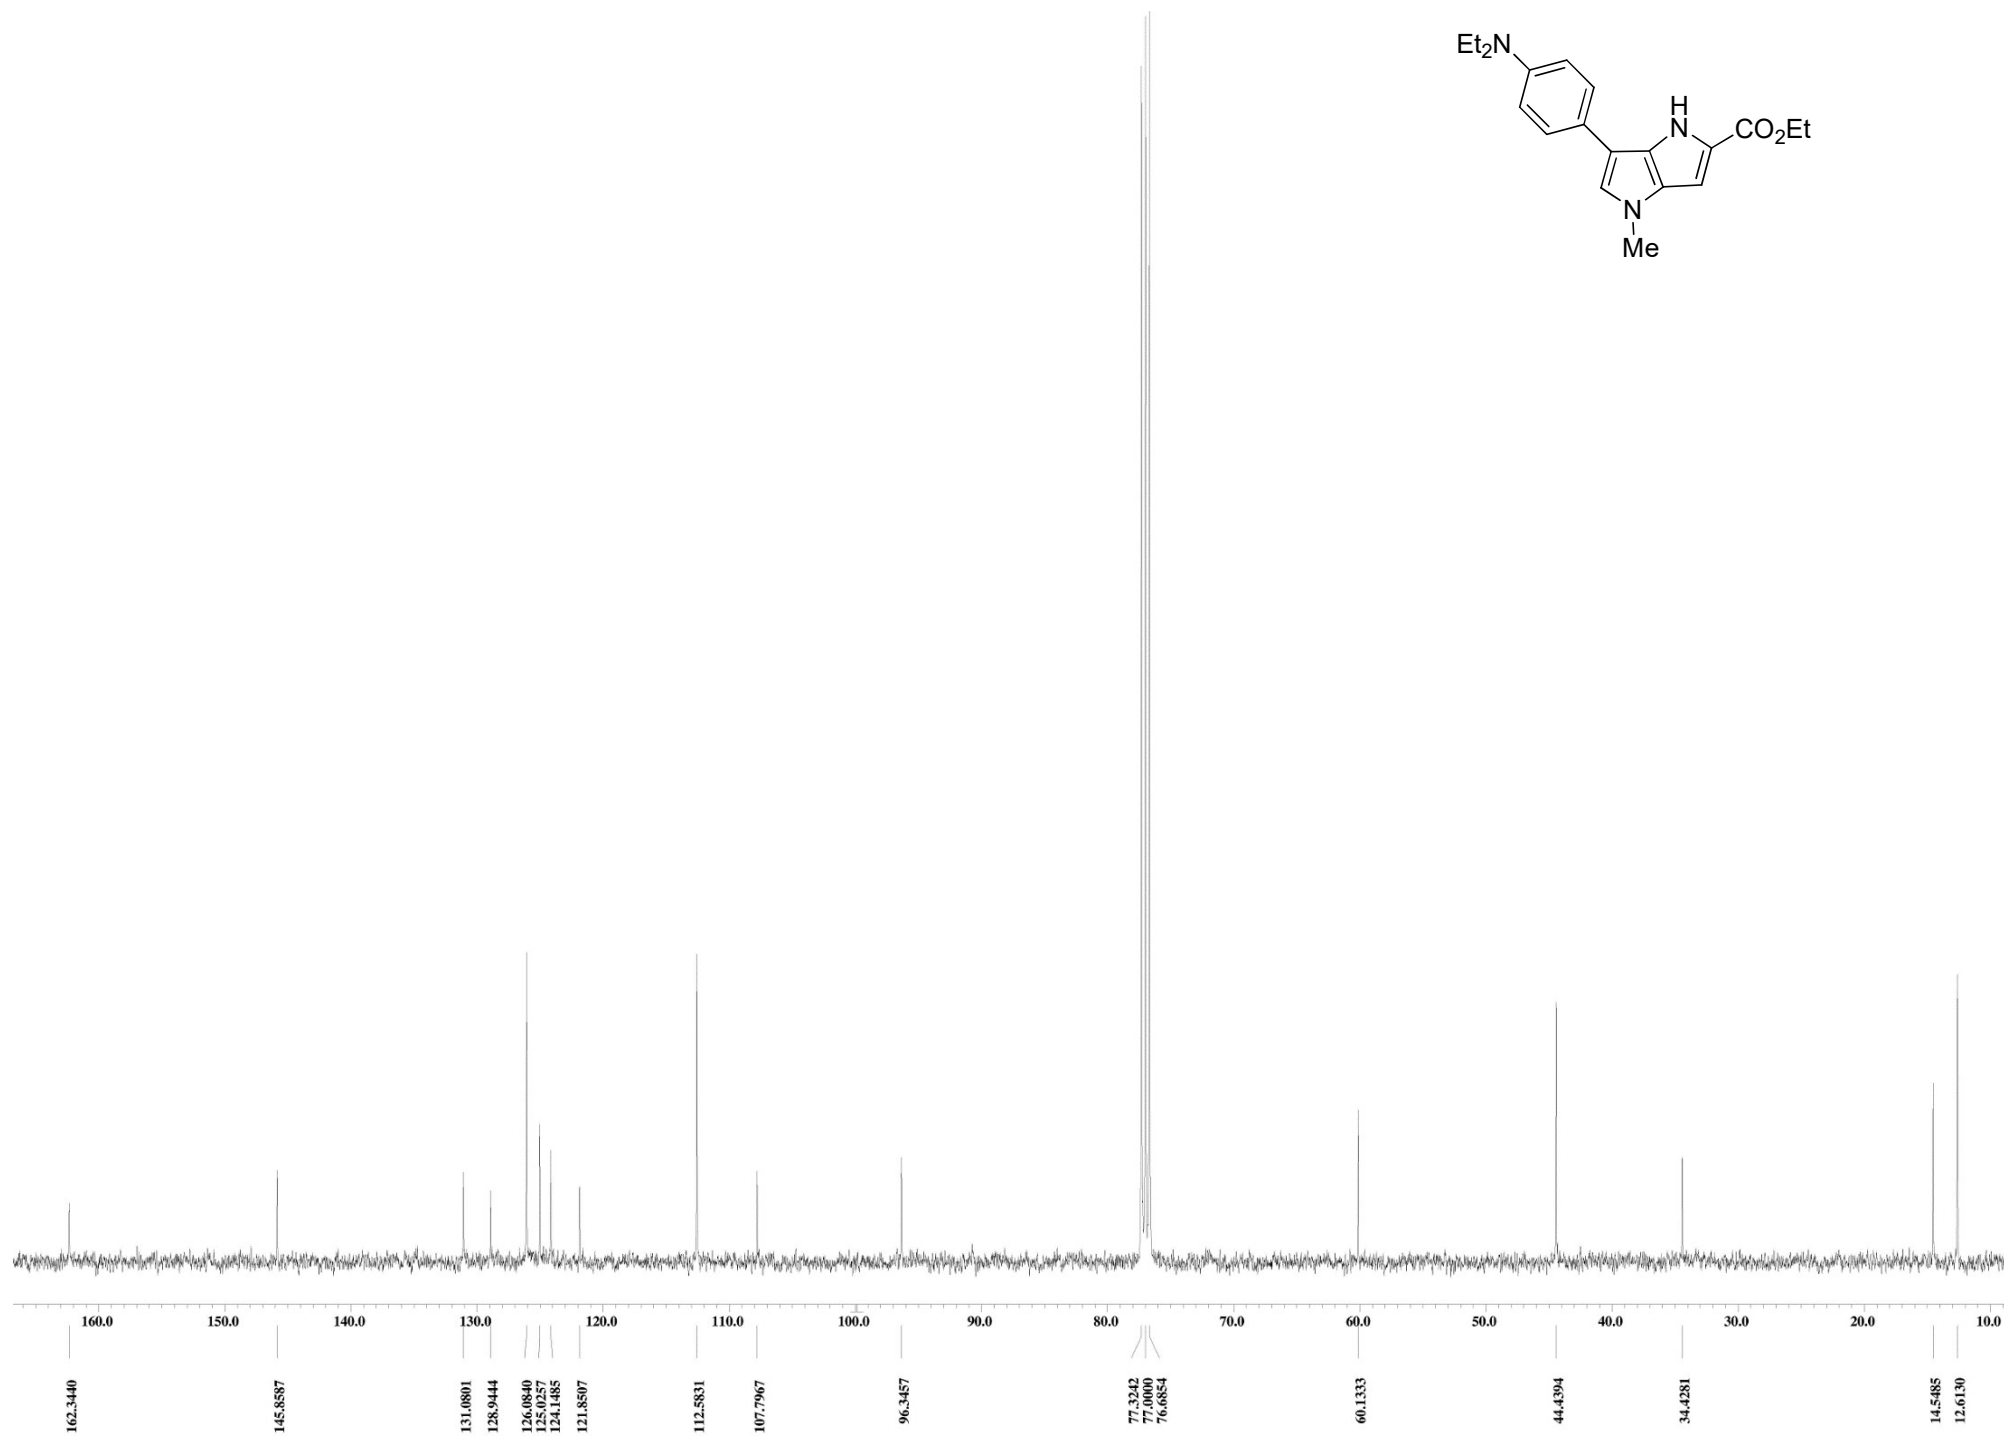

Figure S17. <sup>13</sup>C NMR spectrum of 6.
